# Supplementary material for: HybPiper: Extracting coding sequence and introns for phylogenetics from high‐throughput sequencing reads using target enrichment
Source: Atypon-hosted journal article supplement (doi:10.3732/apps.1600016), 2016-07-01

APPENDIX S4. Comparison of depth-of-coverage estimates with duplicate reads present (left, as in Figure 2) or removed using SuperDeDuper (right) for four exemplar loci. Each gray line represents a rolling average depth across 50 bp for one of 22 *Artocarpus* species. The dark line represents the average depth of coverage for all samples. Red bars indicate the location of exon boundaries predicted in the *Artocarpus camansi* draft genome.

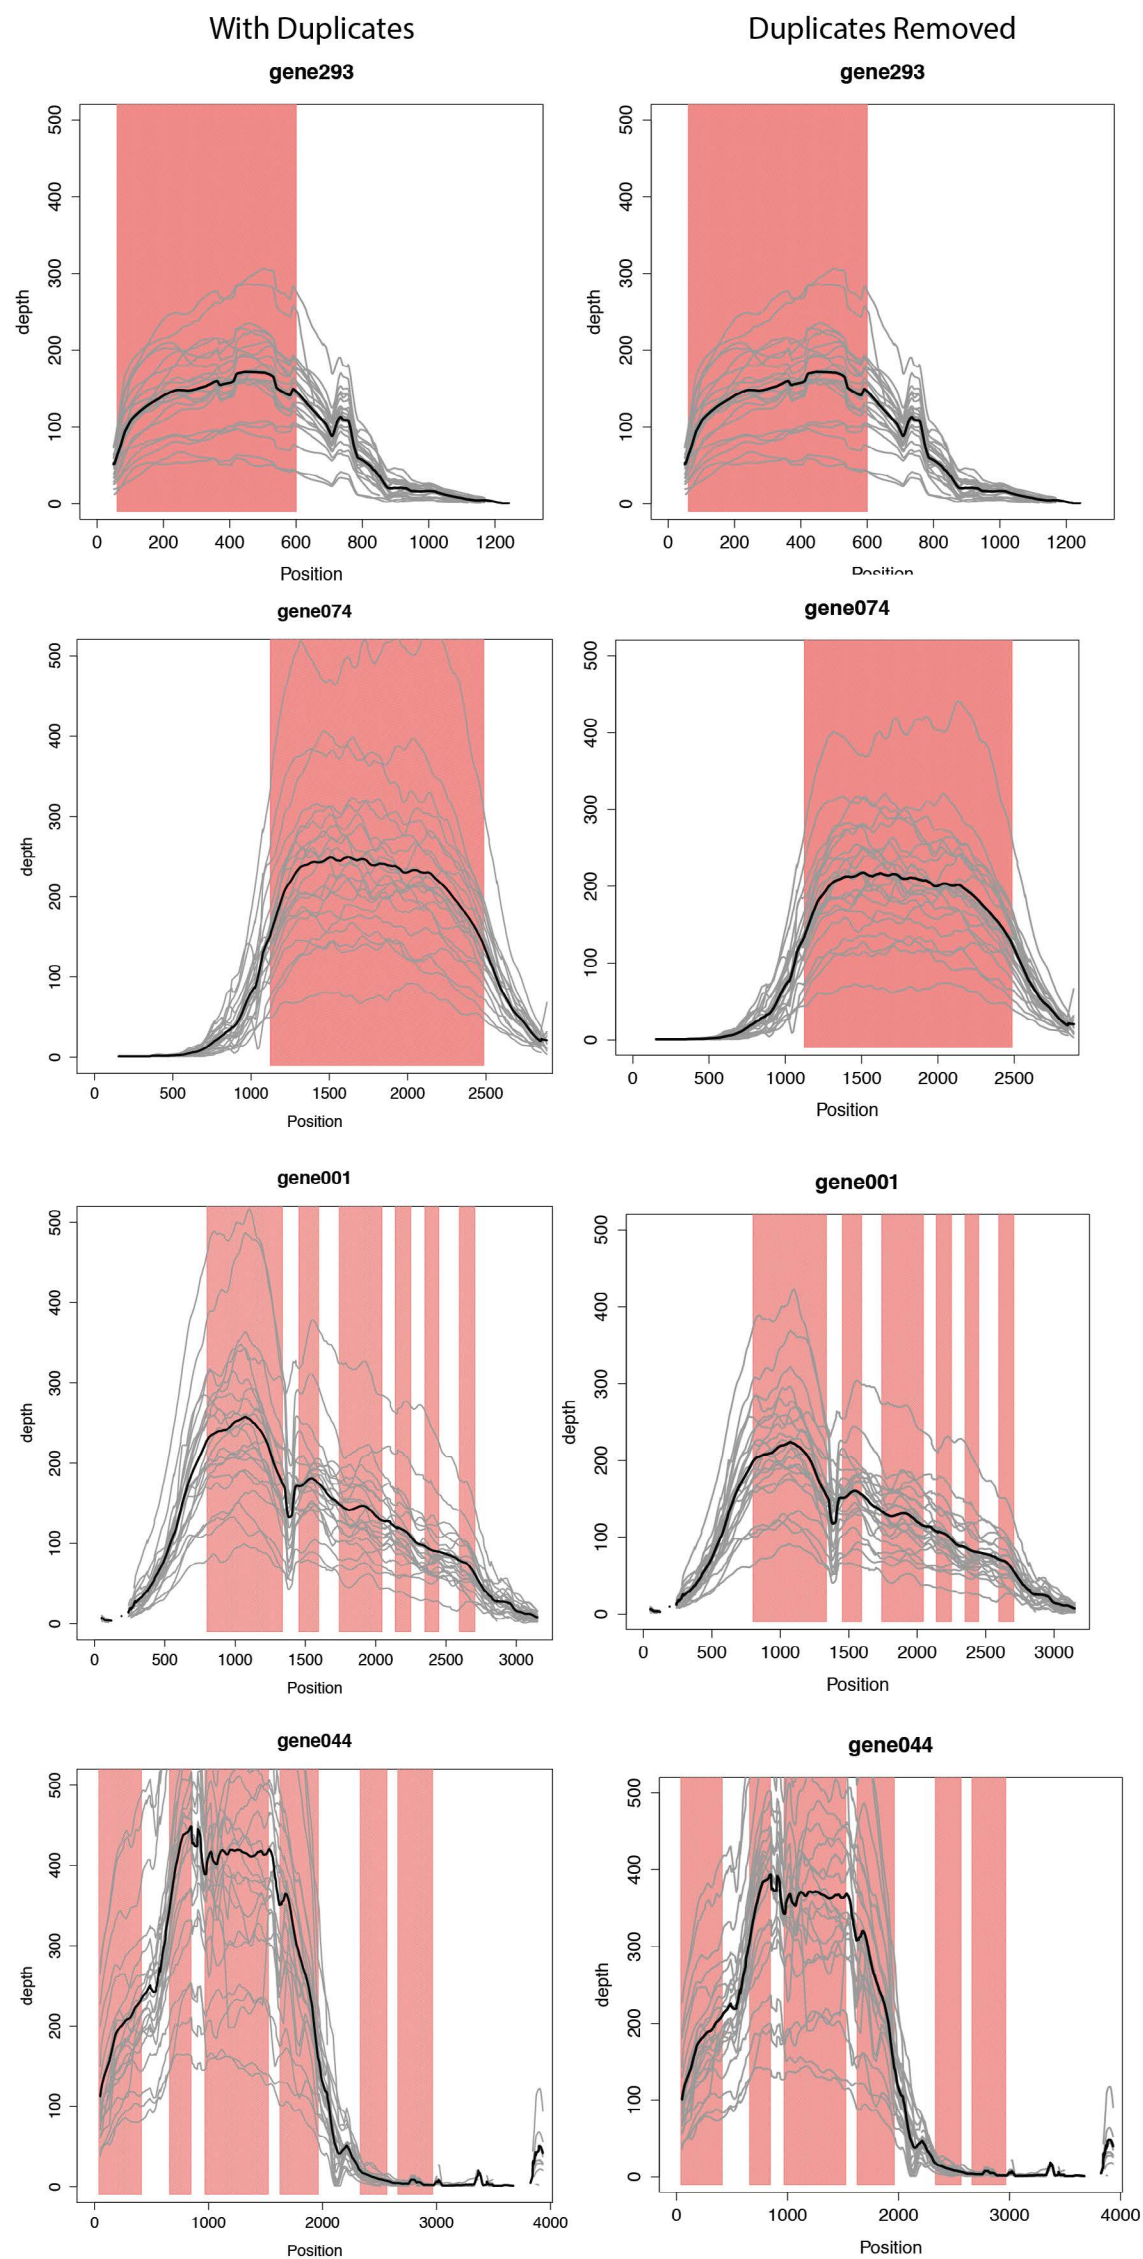

Supplement: apps.1600016_s4.pdf [file apps.1600016_s4.pdf]
